# Supplementary material for: Fabrication of silica/calcium alginate nanocomposite based on rice husk ash for efficient adsorption of phenol from water
Source: Royal Society of Chemistry journal article supplement (doi:10.1039/d4ra04070h), 2024-01-01
Supplement: d4ra04070h1.pdf [file d4ra04070h1.pdf]

Fabrication of silica/calcium alginate nanocomposite based on rice husk ash for efficient adsorption of phenol from water

Manal A. Khoj

Department of Chemistry, Faculty of Science, Umm Al-Qura University, Makkah, Saudi Arabia.

Email: [makhoj@uqu.edu.sa](mailto:makhoj@uqu.edu.sa)

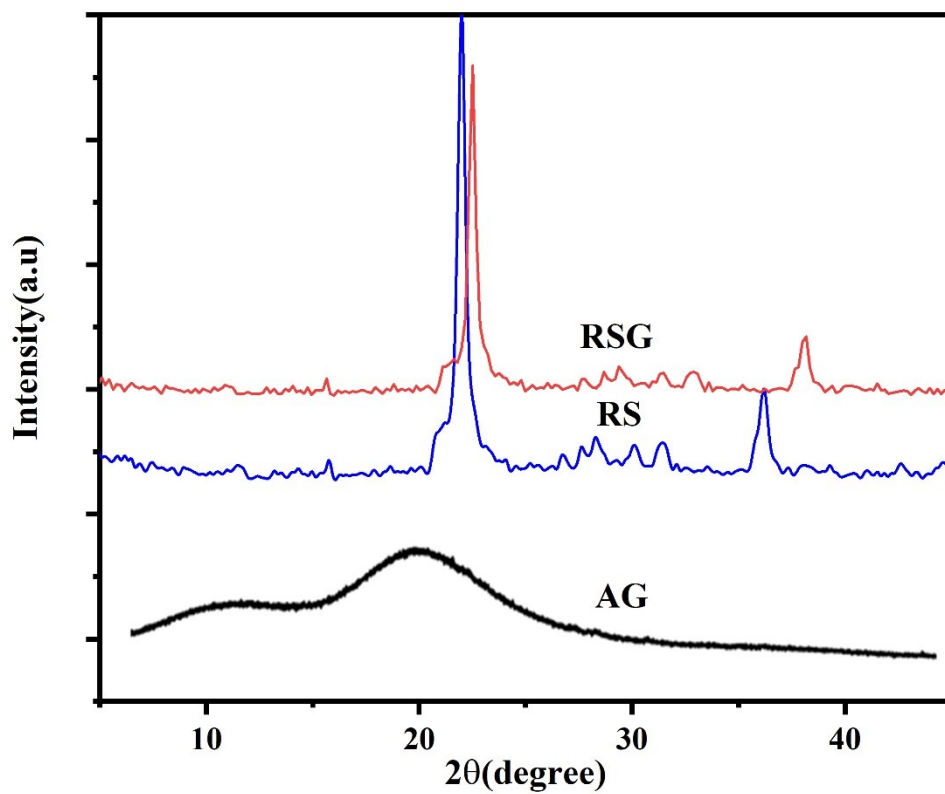

**Fig. S1:** XRD patterns of RS, AG, and RSG

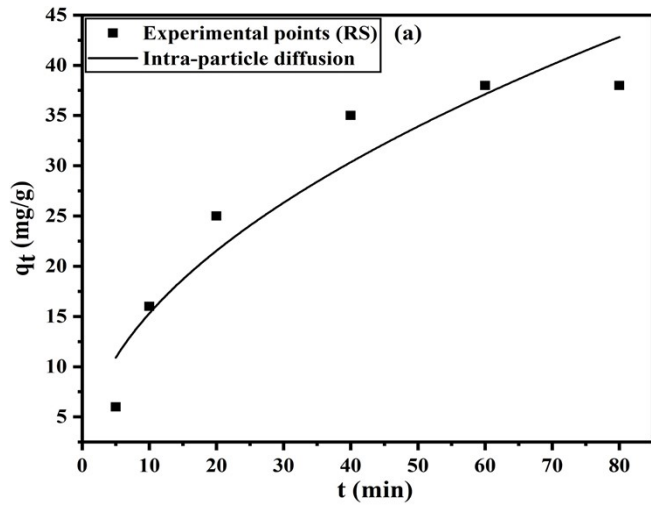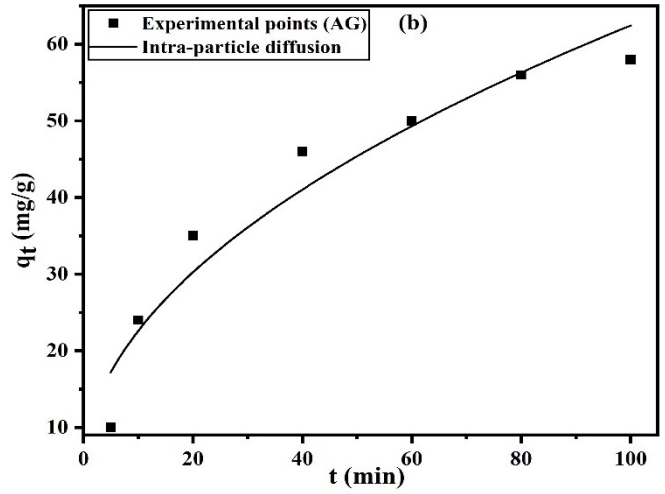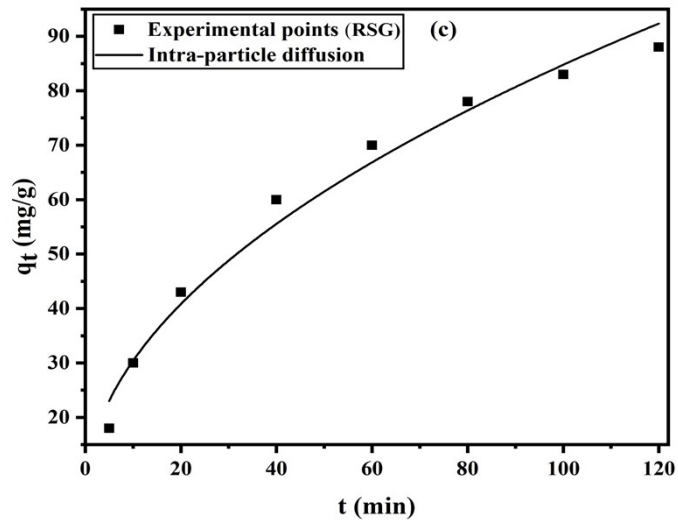

| T(°C) | % of RH | T(°C) | % of RS | T(°C) | % of AG | T(°C) | % of RSC |
|-------|---------|-------|---------|-------|---------|-------|----------|
| 20.0  | 100.00  | 20.0  | 100.00  | 22.0  | 100.00  | 22.0  | 100.00   |
| 30.2  | 100.00  | 30.0  | 100.00  | 30.0  | 100.00  | 30.0  | 100.00   |
| 40.7  | 100.00  | 35.0  | 100.00  | 40.0  | 99.90   | 40.0  | 99.91    |
| 55.0  | 99.80   | 40.0  | 100.00  | 45.0  | 99.80   | 45.0  | 99.82    |
| 60.9  | 99.80   | 55.0  | 100.00  | 50.0  | 99.60   | 50.0  | 99.61    |
| 70.3  | 99.60   | 76.0  | 99.60   | 60.0  | 99.40   | 60.0  | 99.43    |
| 86.0  | 99.20   | 99.9  | 99.10   | 80.0  | 99.20   | 76.9  | 97.81    |
| 98.3  | 99.00   | 121.0 | 99.10   | 100.0 | 97.00   | 95.4  | 95.44    |
| 100.0 | 98.10   | 128.0 | 98.80   | 113.0 | 96.00   | 115.5 | 94.33    |
| 123.6 | 95.00   | 147.0 | 98.50   | 139.0 | 93.00   | 135.6 | 91.91    |
| 138.5 | 94.00   | 165.0 | 97.80   | 162.0 | 90.00   | 162.0 | 90.00    |
| 150.4 | 93.50   | 189.0 | 97.50   | 184.0 | 87.00   | 177.4 | 87.61    |
| 170.3 | 93.00   | 213.0 | 97.00   | 215.0 | 84.00   | 197.6 | 85.05    |

**Fig.S**

**2:** Nonlinear Weber-Morris model plot for phenol adsorption onto RS, AG, and RSG at 20 °C.

**Table S1:** TGA data for the investigated solid samples indicating the residual mass % for 0.05 g of samples against temperature up to 800 °C.

|       |       |       |       |       |       |       |       |
|-------|-------|-------|-------|-------|-------|-------|-------|
| 180.1 | 91.00 | 230.0 | 96.50 | 242.0 | 80.00 | 217.7 | 83.08 |
| 188.3 | 91.00 | 249.0 | 96.30 | 254.0 | 78.00 | 236.2 | 80.53 |
| 200.2 | 90.00 | 273.0 | 95.70 | 276.0 | 75.00 | 251.2 | 77.98 |
| 222.0 | 88.80 | 294.0 | 95.70 | 296.0 | 71.00 | 269.6 | 75.62 |
| 240.3 | 87.80 | 313.0 | 95.60 | 307.3 | 69.63 | 288.2 | 73.27 |
| 258.0 | 86.00 | 334.0 | 95.50 | 315.0 | 68.00 | 309.8 | 71.11 |
| 270.3 | 84.60 | 357.0 | 95.50 | 333.0 | 66.00 | 320.3 | 70.29 |
| 288.0 | 81.00 | 378.0 | 95.00 | 360.0 | 62.20 | 331.6 | 69.13 |
| 300.7 | 78.00 | 394.5 | 94.70 | 375.0 | 60.80 | 354.9 | 67.76 |
| 312.0 | 75.00 | 416.0 | 94.70 | 387.0 | 59.00 | 365.3 | 67.39 |
| 318.9 | 73.00 | 434.0 | 94.70 | 406.0 | 57.00 | 378.5 | 66.39 |
| 331.0 | 69.00 | 463.0 | 94.60 | 418.0 | 56.00 | 403.6 | 65.02 |
| 343.7 | 65.80 | 484.0 | 94.50 | 434.0 | 54.80 | 423.7 | 63.84 |
| 354.0 | 62.70 | 505.0 | 94.20 | 455.0 | 52.00 | 438.7 | 62.85 |
| 373.4 | 56.40 | 524.0 | 94.10 | 474.0 | 50.60 | 468.5 | 62.17 |
| 386.0 | 52.00 | 549.0 | 94.10 | 485.6 | 49.37 | 457.1 | 62.06 |
| 397.1 | 48.50 | 562.6 | 94.10 | 504.0 | 47.60 | 477.2 | 61.10 |
| 412.0 | 45.00 | 576.0 | 94.10 | 495.5 | 48.68 | 497.4 | 60.51 |
| 433.5 | 42.00 | 588.1 | 94.07 | 512.2 | 46.34 | 517.5 | 59.32 |
| 455.0 | 40.00 | 603.0 | 94.00 | 524.0 | 45.00 | 529.9 | 59.21 |
| 483.4 | 37.50 | 615.1 | 94.00 | 540.0 | 43.00 | 542.7 | 58.93 |
| 512.0 | 34.50 | 627.0 | 94.00 | 556.0 | 41.50 | 552.8 | 58.67 |
| 536.5 | 32.09 | 651.0 | 94.00 | 571.0 | 39.80 | 567.7 | 58.14 |
| 558.0 | 31.70 | 663.4 | 94.00 | 590.0 | 38.00 | 592.8 | 58.10 |
| 588.0 | 29.06 | 673.0 | 94.00 | 598.2 | 36.37 | 590.0 | 58.10 |
| 615.5 | 27.50 | 691.0 | 94.00 | 606.1 | 35.48 | 617.0 | 57.98 |
| 644.0 | 26.09 | 701.9 | 93.99 | 617.0 | 34.00 | 643.0 | 57.90 |
| 670.0 | 25.60 | 715.0 | 93.80 | 643.0 | 33.80 | 668.2 | 57.87 |
| 693.0 | 24.08 | 728.1 | 93.80 | 675.0 | 33.70 | 675.0 | 57.80 |
| 732.3 | 23.60 | 740.0 | 93.80 | 702.0 | 33.58 | 702.0 | 57.50 |
| 766.0 | 23.20 | 749.3 | 93.80 | 724.8 | 33.46 | 721.6 | 57.47 |
| 790.0 | 22.61 | 760.0 | 93.80 | 753.0 | 33.00 | 753.0 | 57.12 |
| 795.2 | 22.70 | 780.0 | 93.80 | 764.0 | 33.00 | 764.0 | 57.00 |
| 800.0 | 22.00 | 800.0 | 93.80 | 800.0 | 33.00 | 800.0 | 57.00 |
